# Supplementary material for: An empirical energy landscape reveals mechanism of proteasome in polypeptide translocation
Source: eLife journal article supplement (doi:10.7554/elife.71911), 2022-01-20
Supplement: supp [file elife-71911-supp-v1.zip]

Archive with 33 entries (33 files):
- elife_poa_e71911_Figure_1_figure_supplement_1.pdf
- elife_poa_e71911_Figure_1_figure_supplement_2.pdf
- elife_poa_e71911_Figure_2_figure_supplement_1.pdf
- elife_poa_e71911_Figure_2_figure_supplement_2.pdf
- elife_poa_e71911_Figure_3_figure_supplement_1.pdf
- elife_poa_e71911_Figure_3_Figure_supplement_2.pdf
- elife_poa_e71911_Figure_4_figure_supplement_1.pdf
- elife_poa_e71911_Figure_4_figure_supplement_2.pdf
- elife_poa_e71911_Figure_4_figure_supplement_4.pdf
- elife_poa_e71911_Figure_4_figure_supplement_3.pdf
- elife_poa_e71911_Figure_4_figure_supplement_5.pdf
- elife_poa_e71911_Figure_5_figure_supplement_1.pdf
- elife_poa_e71911_Figure_5_figure_supplement_2.pdf
- elife_poa_e71911_Figure_5_figure_supplement_3.pdf
- elife_poa_e71911_Figure_5_figure_supplement_5.pdf
- elife_poa_e71911_Figure_5_figure_supplement_4.pdf
- elife_poa_e71911_Figure_6_figure_supplement_1.pdf
- elife_poa_e71911_Figure_6_figure_supplement_2.pdf
- elife_poa_e71911_Figure_6_figure_supplement_3.pdf
- elife_poa_e71911_Figure_6_figure_supplement_4.pdf
- elife_poa_e71911_Figure_6_figure_supplement_5.pdf
- elife_poa_e71911_Figure_6_figure_supplement_6.pdf
- elife_poa_e71911_Supplementary_file_1.xlsx
- elife_poa_e71911_Transparent_Reporting_File.docx
- elife_poa_e71911_Figure_3_source_data_1.pdf
- elife_poa_e71911_Figure_3_source_data_2.pdf
- elife_poa_e71911_Figure_4_source_data_1.pdf
- elife_poa_e71911_Figure_4_source_data_2.pdf
- elife_poa_e71911_Figure_4_source_data_3.pdf
- elife_poa_e71911_Figure_4_source_data_4.pdf
- elife_poa_e71911_Figure_5_source_data_2.pdf
- elife_poa_e71911_Figure_5_source_data_1.pdf
- elife_poa_e71911_Figure_5_source_data_3.pdf
