# Supplementary material for: An empirical energy landscape reveals mechanism of proteasome in polypeptide translocation
Source: eLife journal article supplement (doi:10.7554/elife.71911), 2022-01-20
Supplement: supp [file elife-71911-supp-v1.zip › elife_poa_e71911_Figure_1_figure_supplement_2.pdf]

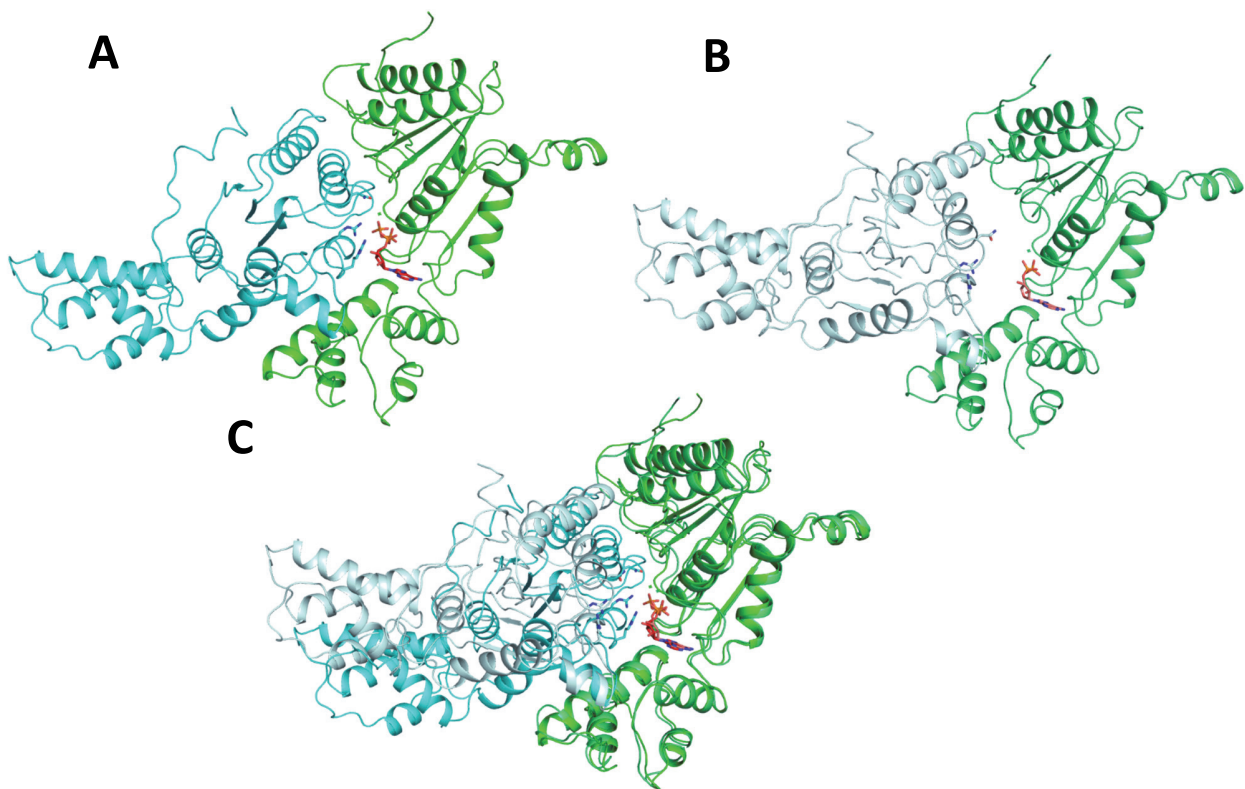

**Figure 1-figure supplement 2. A.** The closed interface of the ATPase domains of Rpt3-Rpt4 in the E<sub>D1</sub> cryo-EM state. Green: Rpt3; Cyan: Rpt4; Red: ATP; Arginine fingers on Rpt4 were shown with sticks. **B.** The open interface of Rpt3-Rpt4 in the E<sub>D2</sub> cryo-EM state. Red: ADP. **C.** Open and closed structures were aligned by Rpt3(Green). Cyan: Rpt4 in E<sub>D1</sub>; light cyan: Rpt4 in E<sub>D2</sub>.
