# Supplementary material for: An empirical energy landscape reveals mechanism of proteasome in polypeptide translocation
Source: eLife journal article supplement (doi:10.7554/elife.71911), 2022-01-20
Supplement: supp [file elife-71911-supp-v1.zip › elife_poa_e71911_Figure_2_figure_supplement_1.pdf]

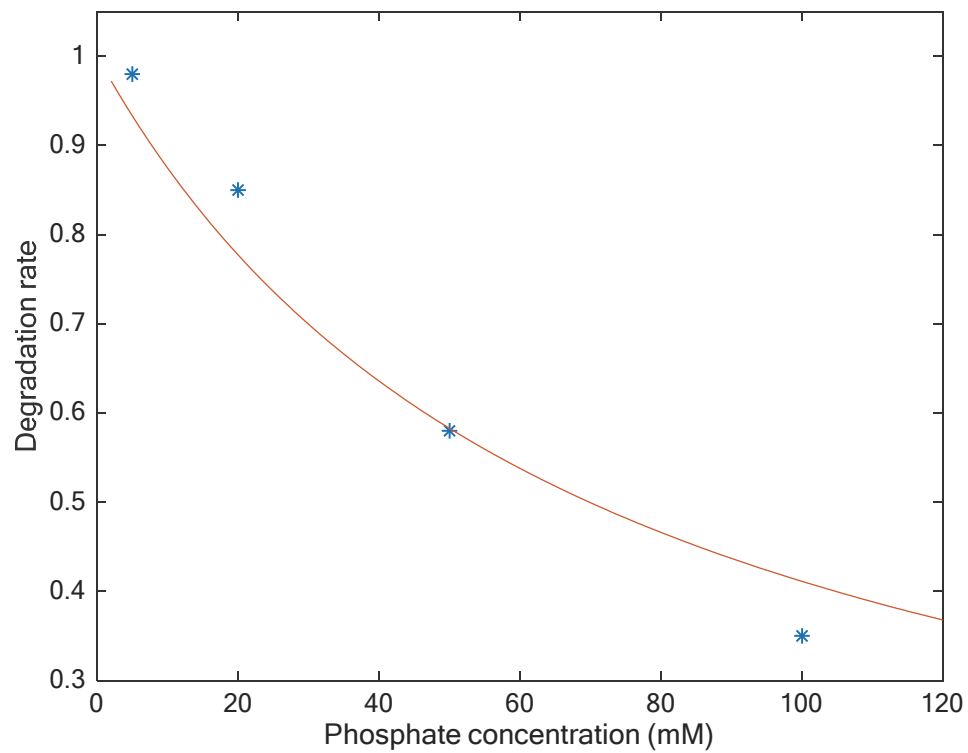

**Figure 2-figure supplement 1. Phosphate groups interact weakly with the proteasomal ATPases.** The degradation rate of ubiquitylated cyclinB-iRFP was measured at different phosphate concentrations, normalized by the rate at zero phosphate. The red curve is a fitting using the inhibitor equation to obtain the  $K_i$  value of 70mM for phosphate. See methods 6 and Fig. 3 for details on the activity assay.
