# Supplementary material for: An empirical energy landscape reveals mechanism of proteasome in polypeptide translocation
Source: eLife journal article supplement (doi:10.7554/elife.71911), 2022-01-20
Supplement: supp [file elife-71911-supp-v1.zip › elife_poa_e71911_Figure_3_figure_supplement_1.pdf]

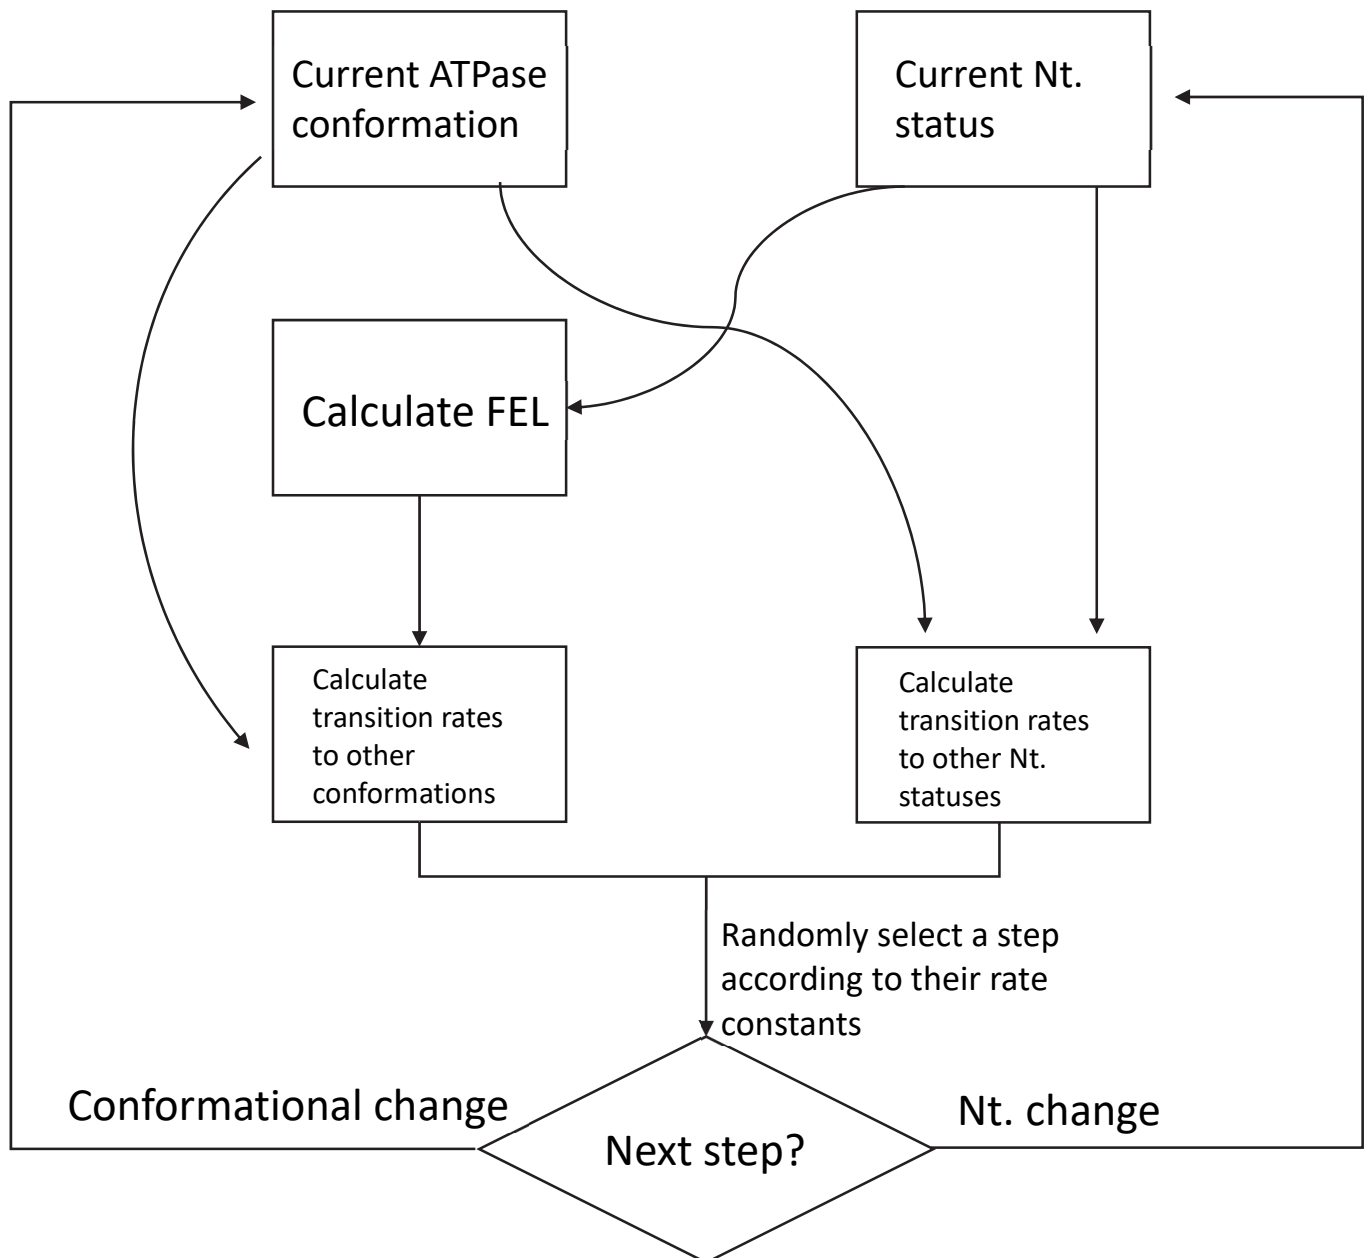

**Figure 3-figure supplement 1. A block diagram for simulating the dynamics of proteasome using the FEL model.** See methods §9 for a detailed description of the process.
