# Supplementary material for: An empirical energy landscape reveals mechanism of proteasome in polypeptide translocation
Source: eLife journal article supplement (doi:10.7554/elife.71911), 2022-01-20
Supplement: supp [file elife-71911-supp-v1.zip › elife_poa_e71911_Figure_3_Figure_supplement_2.pdf]

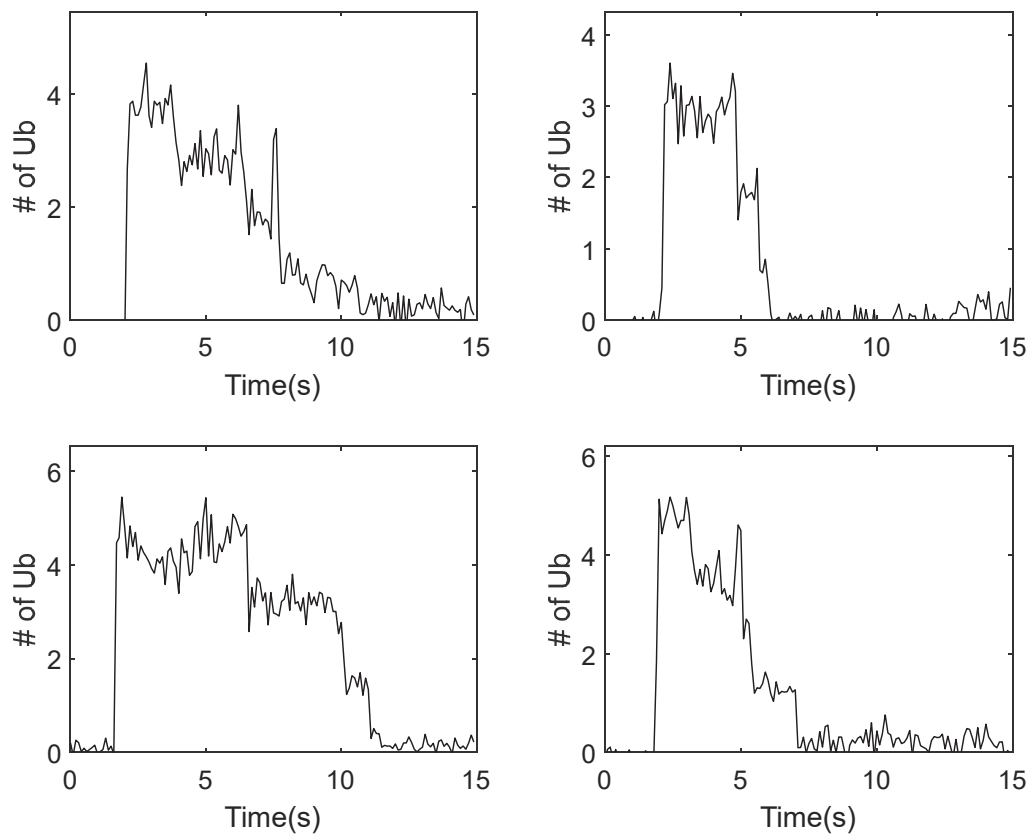

**Figure 3-figure supplement 2. Examples of single-molecule traces showing processive ubiquitin chain removal.** Purified cycB\_NT(K18,36,64) was ubiquitylated by APC-Cdh1 and E2 UbcH10 with Dylight550-Ub and was subjected to single-molecule proteasome assay as described in methods §7. Four traces with the signature of processive ubiquitin chain removal are presented as examples.
