# Supplementary material for: An empirical energy landscape reveals mechanism of proteasome in polypeptide translocation
Source: eLife journal article supplement (doi:10.7554/elife.71911), 2022-01-20
Supplement: supp [file elife-71911-supp-v1.zip › elife_poa_e71911_Figure_4_figure_supplement_2.pdf]

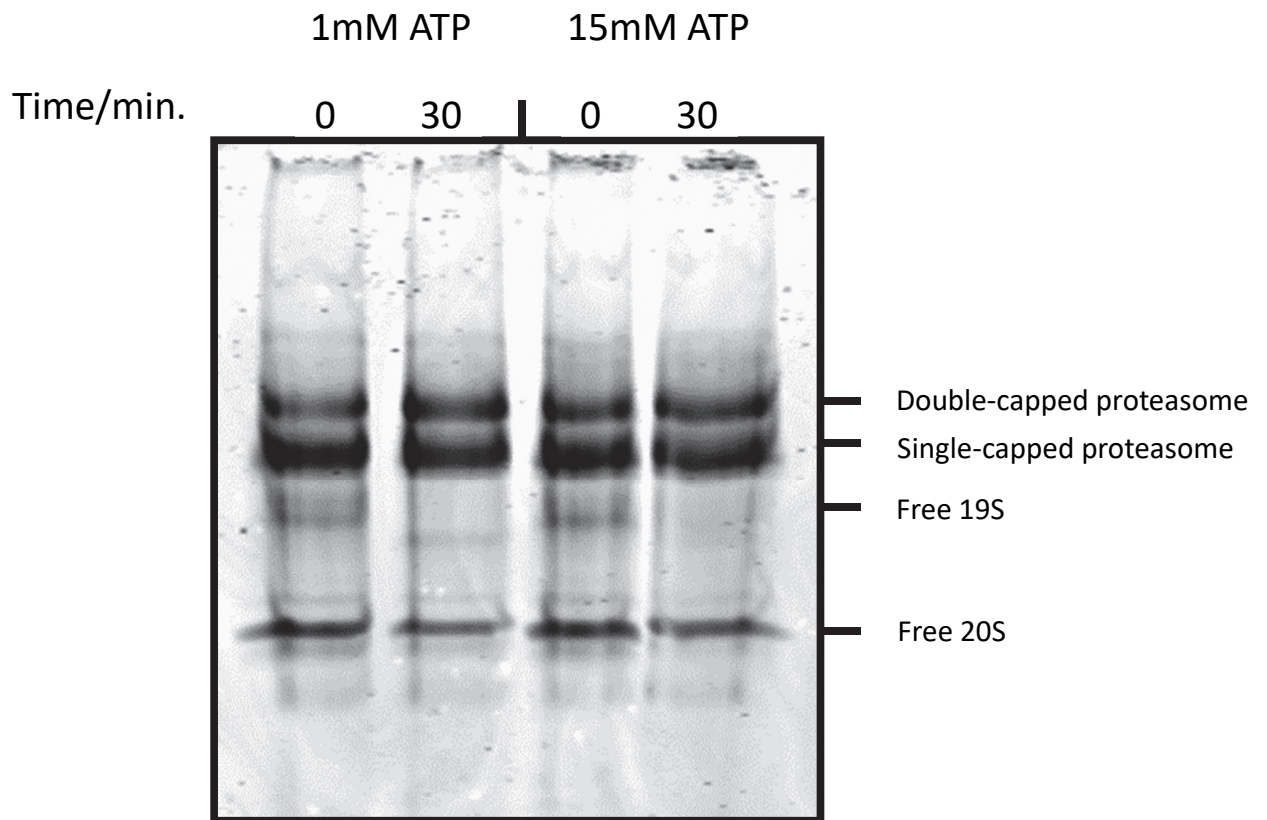

**Figure 4-figure supplement 2. High ATP concentration does not cause proteasome disassembly.** Purified human 26S proteasome was incubated with ATP-Mg<sup>2+</sup> at indicated concentrations. After incubation, the sample was fixed with 1mM BS3 (bis(sulfosuccinimidyl)suberate) for 30 minutes and was analyzed on a native gel in the absence of nucleotide.
