# Supplementary material for: An empirical energy landscape reveals mechanism of proteasome in polypeptide translocation
Source: eLife journal article supplement (doi:10.7554/elife.71911), 2022-01-20
Supplement: supp [file elife-71911-supp-v1.zip › elife_poa_e71911_Figure_4_figure_supplement_3.pdf]

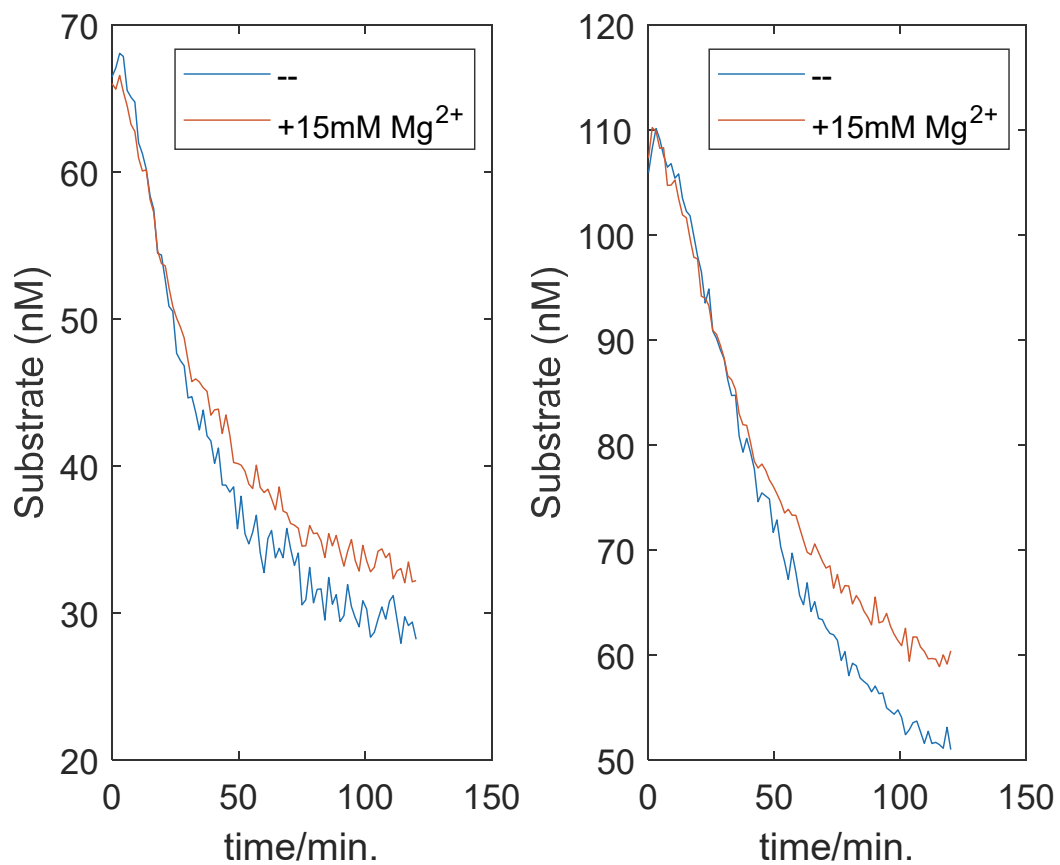

**Figure 4-figure supplement 3. High concentration of Mg<sup>2+</sup> alone does not affect the degradation kinetics.** The quantitative degradation assay of ubiquitylated cyclinB-iRFP was performed as described in methods with 0.5mM ATP, with or without an extra 15mM MgCl<sub>2</sub>. Two substrate concentrations were tested.
