# Supplementary material for: An empirical energy landscape reveals mechanism of proteasome in polypeptide translocation
Source: eLife journal article supplement (doi:10.7554/elife.71911), 2022-01-20
Supplement: supp [file elife-71911-supp-v1.zip › elife_poa_e71911_Figure_4_figure_supplement_4.pdf]

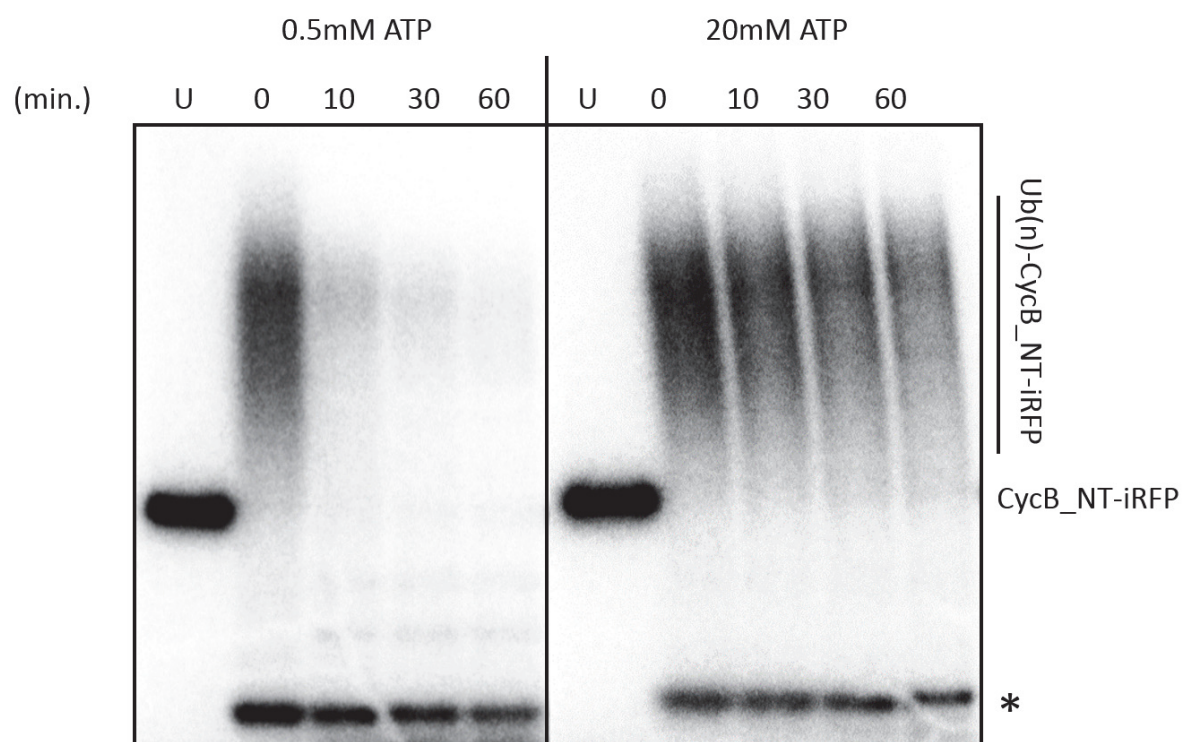

**Figure 4-figure supplement 4. High ATP concentration does not lead to partial protein degradation or uncoupling between ubiquitylation and degradation.** Ubiquitylated cyclinB-iRFP was radiolabeled with  $^{33}\text{p}$  at both the N- and C-terminus using protein kinase A. The degradation assay was performed as described in methods and was sampled at indicated time points and analyzed by autoradiography. U: unubiquitylated cyclinB-iRFP. “\*”: radiolabeled securin was added as a control for loading and nonspecific dephosphorylation.
