# Supplementary material for: An empirical energy landscape reveals mechanism of proteasome in polypeptide translocation
Source: eLife journal article supplement (doi:10.7554/elife.71911), 2022-01-20
Supplement: supp [file elife-71911-supp-v1.zip › elife_poa_e71911_Figure_4_figure_supplement_5.pdf]

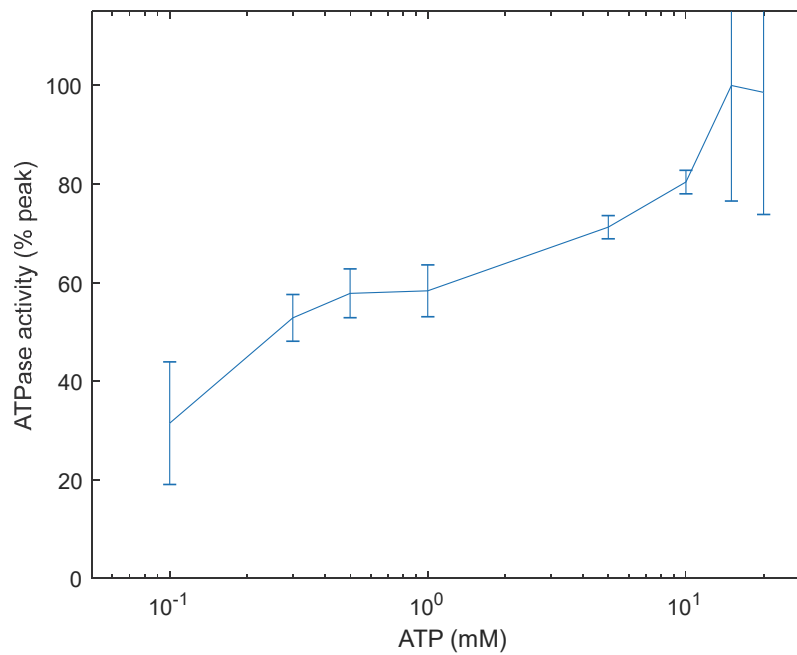

**Figure 4-figure supplement 5. High ATP concentration does not inhibit the ATPase activity of proteasome.** The rate of ATP hydrolysis of purified 26S proteasome was measured in the presence of varying concentrations of ATP-Mg<sup>2+</sup> using a Malachite green assay(13). Denatured ovalbumin was used as a generic substrate for proteasome as described previously(17). Error bars represent three experimental replicas.
