# Supplementary material for: An empirical energy landscape reveals mechanism of proteasome in polypeptide translocation
Source: eLife journal article supplement (doi:10.7554/elife.71911), 2022-01-20
Supplement: supp [file elife-71911-supp-v1.zip › elife_poa_e71911_Figure_5_figure_supplement_1.pdf]

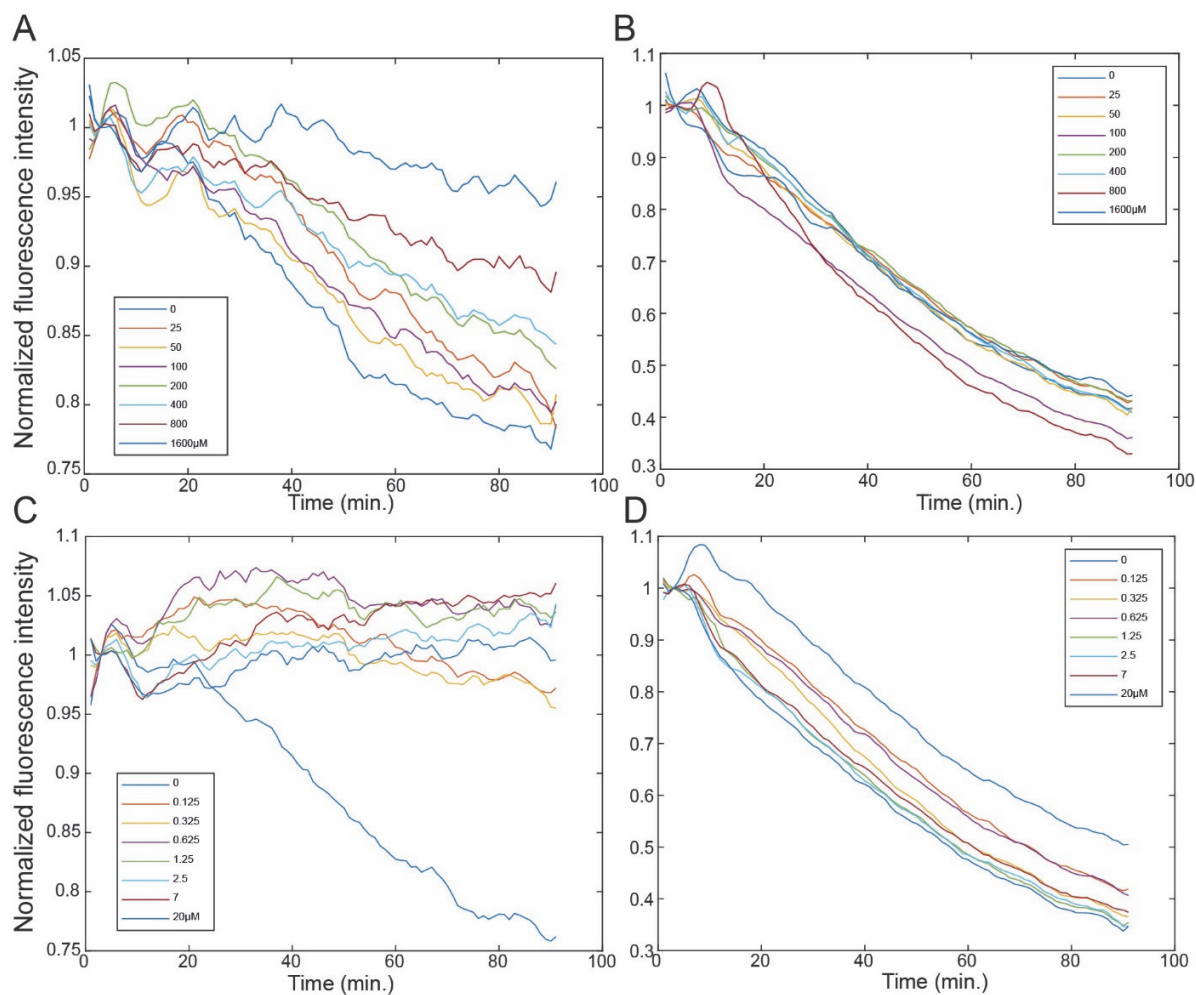

**Figure 5-figure supplement 1. Folic acid slows down the degradation of cyclinB-DHFR-iRFP, but not cyclinB-iRFP.** 100nM ubiquitylated cyclinB-DHFR-iRFP was tested in the quantitative degradation assay with 2nM proteasome at various concentrations of folic acid(**A**) or methotrexate(**C**) as indicated in the legend. Results for cyclinB-iRFP under identical conditions were shown in **B** and **D**.
