# Supplementary material for: An empirical energy landscape reveals mechanism of proteasome in polypeptide translocation
Source: eLife journal article supplement (doi:10.7554/elife.71911), 2022-01-20
Supplement: supp [file elife-71911-supp-v1.zip › elife_poa_e71911_Figure_5_figure_supplement_2.pdf]

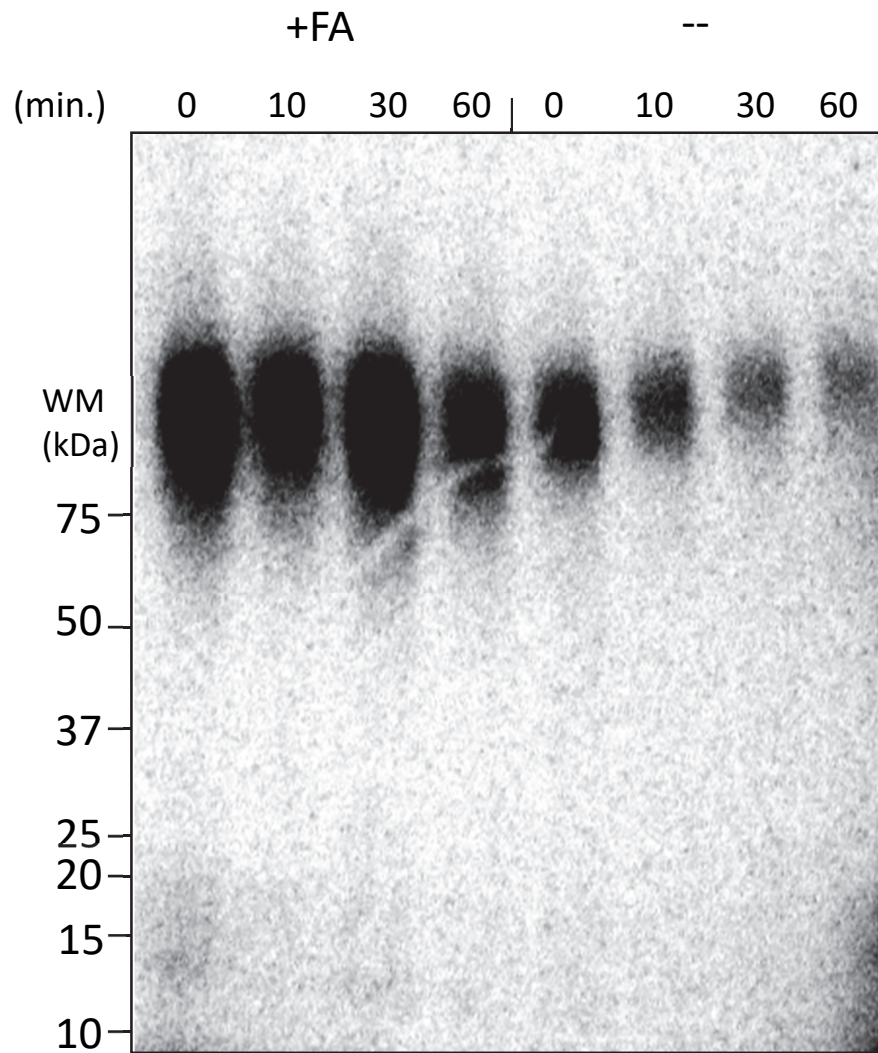

**Figure 5-figure supplement 2. CyclinB-DHFR-iRFP was completely degraded by the proteasome in the presence of folic acid.** Ubiquitylated cyclinB-DHFR-iRFP was radiolabeled with  $^{33}\text{p}$  at both the N- and C-terminus using protein kinase A and was subject to degradation by 2nM purified human 26S proteasome as described in fig. 5-fig. supp. 1. +FA: in the presence of 800 $\mu\text{M}$  folic acid (+FA). Samples were analyzed by autoradiography which was intentionally overexposed to reveal any partially-degraded products.
