# Supplementary material for: An empirical energy landscape reveals mechanism of proteasome in polypeptide translocation
Source: eLife journal article supplement (doi:10.7554/elife.71911), 2022-01-20
Supplement: supp [file elife-71911-supp-v1.zip › elife_poa_e71911_Figure_5_figure_supplement_3.pdf]

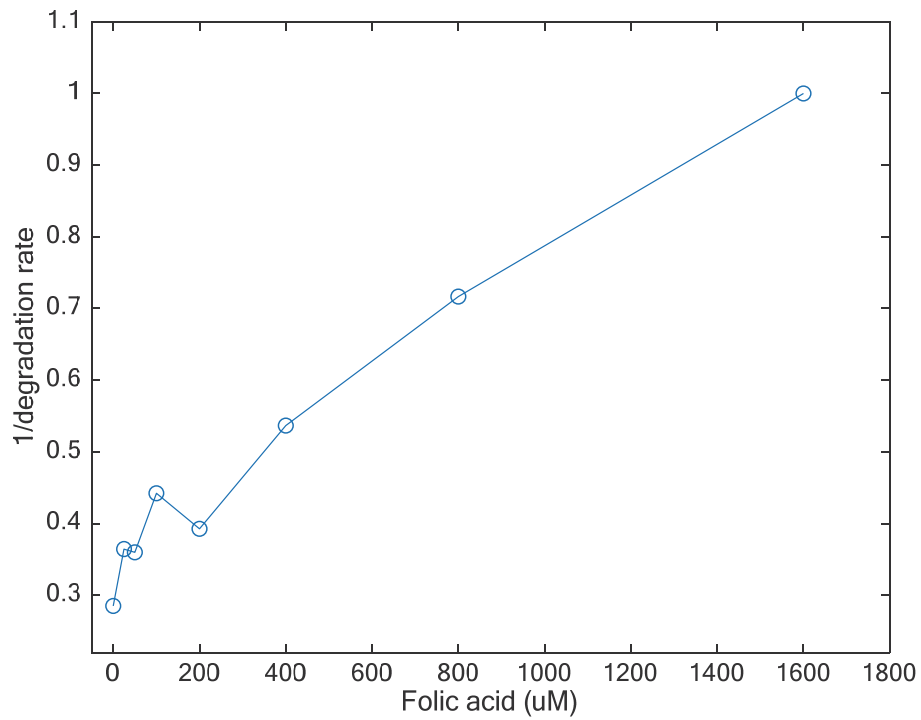

**Figure 5-figure supplement 3. The degradation rate of cyclinB-DHFR-iRFP is inversely proportional to the folic acid concentrations.** The degradation rate of cyclinB-DHFR-iRFP was measured at various folic acid concentrations as described in methods. Its inverse was plotted against the folic acid concentration.
