# Supplementary material for: An empirical energy landscape reveals mechanism of proteasome in polypeptide translocation
Source: eLife journal article supplement (doi:10.7554/elife.71911), 2022-01-20
Supplement: supp [file elife-71911-supp-v1.zip › elife_poa_e71911_Figure_5_figure_supplement_4.pdf]

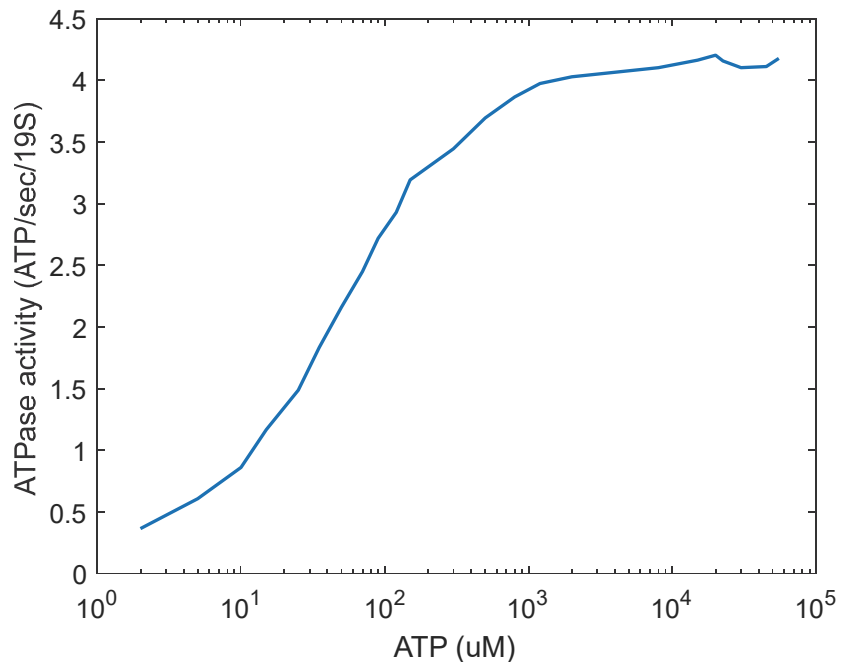

**Figure 5-figure supplement 4. The rate of ATP hydrolysis vs. ATP concentration as predicted by the FEL model.** The predicted rate of ATP hydrolysis per ATPase hexamer was plotted against the concentration of ATP in the FEL simulation as described in methods §9.5.
