# Supplementary material for: An empirical energy landscape reveals mechanism of proteasome in polypeptide translocation
Source: eLife journal article supplement (doi:10.7554/elife.71911), 2022-01-20
Supplement: supp [file elife-71911-supp-v1.zip › elife_poa_e71911_Figure_5_figure_supplement_5.pdf]

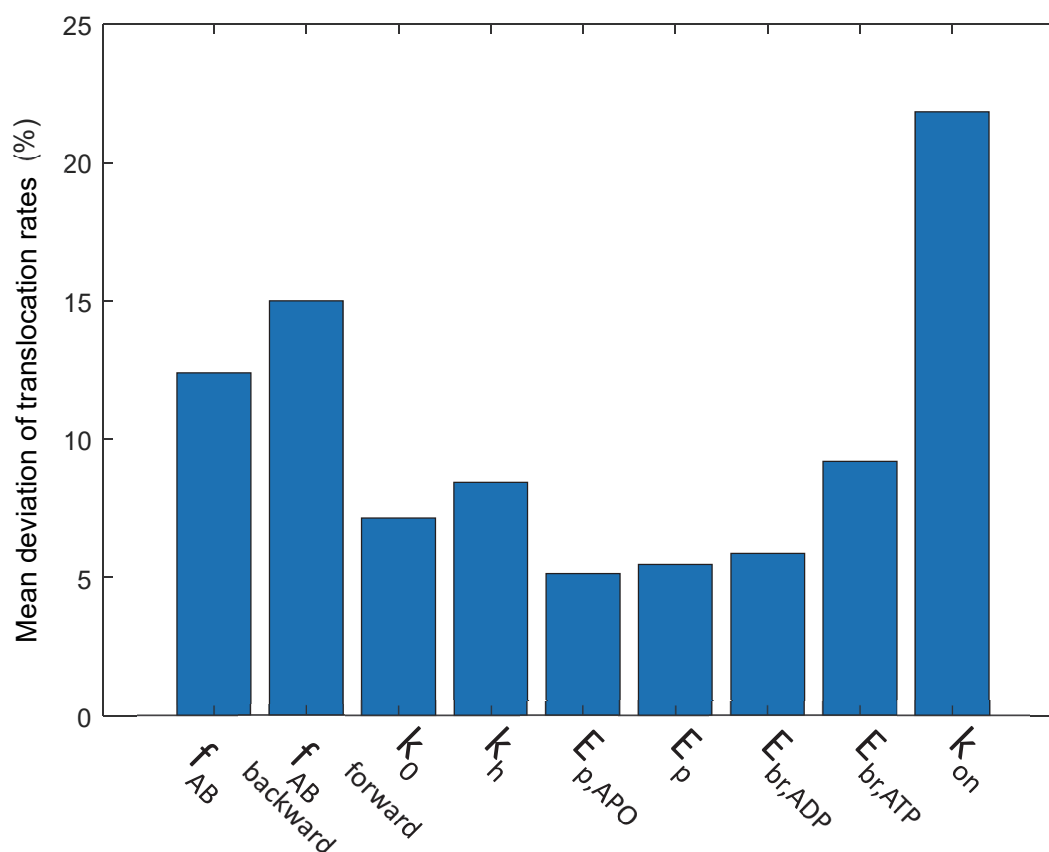

**Figure 5-figure supplement 5. Sensitivity of the simulated translocation rates to parameter variations.** A parameter is either increased or decreased by 30%, except for  $k_{on}$  which is varied by 3 fold due to the large uncertainty in its estimation. The simulated translocation rates under various nucleotide conditions in this study were compared with the original, and the mean deviation over the original translocation rate is presented. See methods 9.6.
