# Supplementary material for: An empirical energy landscape reveals mechanism of proteasome in polypeptide translocation
Source: eLife journal article supplement (doi:10.7554/elife.71911), 2022-01-20
Supplement: supp [file elife-71911-supp-v1.zip › elife_poa_e71911_Figure_5_source_data_1.pdf]

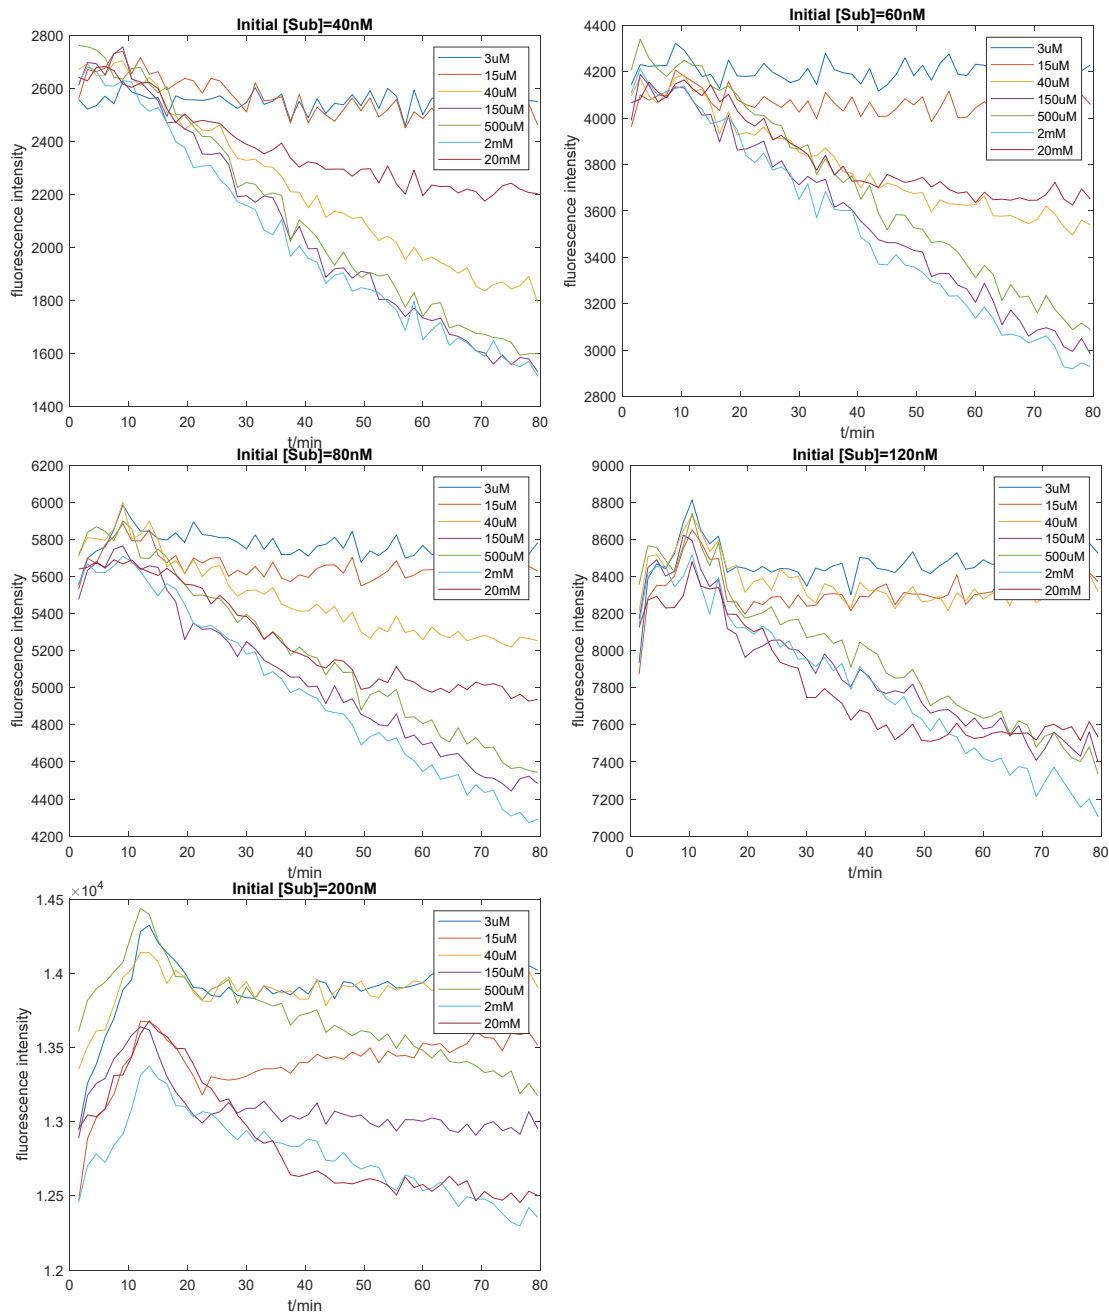

**Source data related to figure 5A,B.** Ubiquitylated cycB-DHFR-iRFP (sub) at indicated concentrations was incubated with purified 26S proteasome in the presence of various concentrations of ATP without folic acid. The fluorescence intensity from iRFP was monitored using a plate reader. Each trace is an average of three replica.
