# Supplementary material for: An empirical energy landscape reveals mechanism of proteasome in polypeptide translocation
Source: eLife journal article supplement (doi:10.7554/elife.71911), 2022-01-20
Supplement: supp [file elife-71911-supp-v1.zip › elife_poa_e71911_Figure_5_source_data_3.pdf]

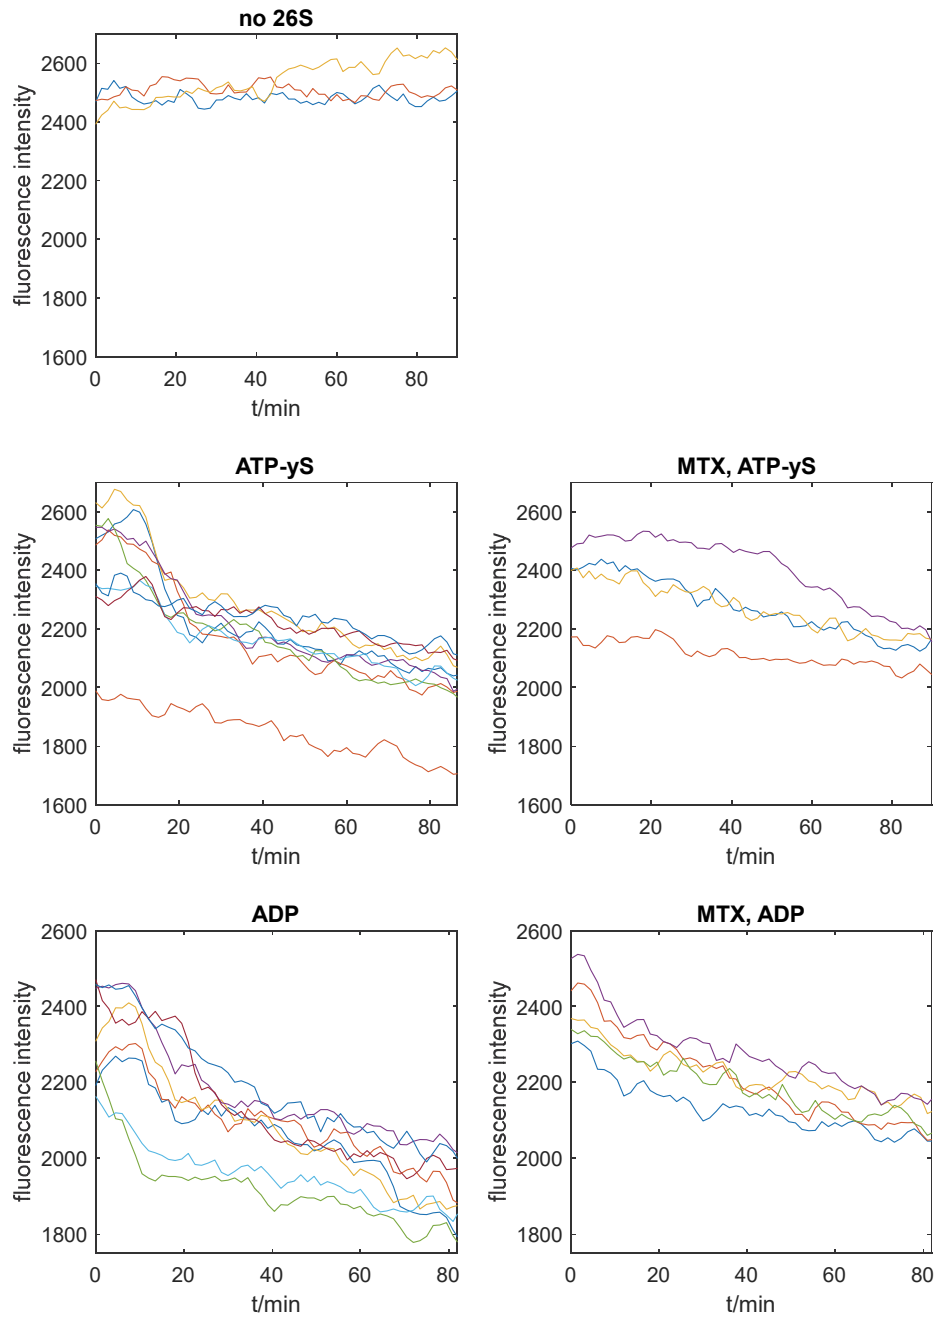

**Source data related to figure 5F.** Ubiquitylated cycB-iRFP was incubated with purified 26S proteasome in the presence of ubiquitylated cycB-DHFR-iRFP<sup>(Dark)</sup> as a competitor. The buffer contains 500μM ATP mixed with either ADP or ATP-γS. Methotrexate (MTX) was added as indicated. Each trace is an independent replicate.
