# Supplementary material for: An empirical energy landscape reveals mechanism of proteasome in polypeptide translocation
Source: eLife journal article supplement (doi:10.7554/elife.71911), 2022-01-20
Supplement: supp [file elife-71911-supp-v1.zip › elife_poa_e71911_Figure_6_figure_supplement_1.pdf]

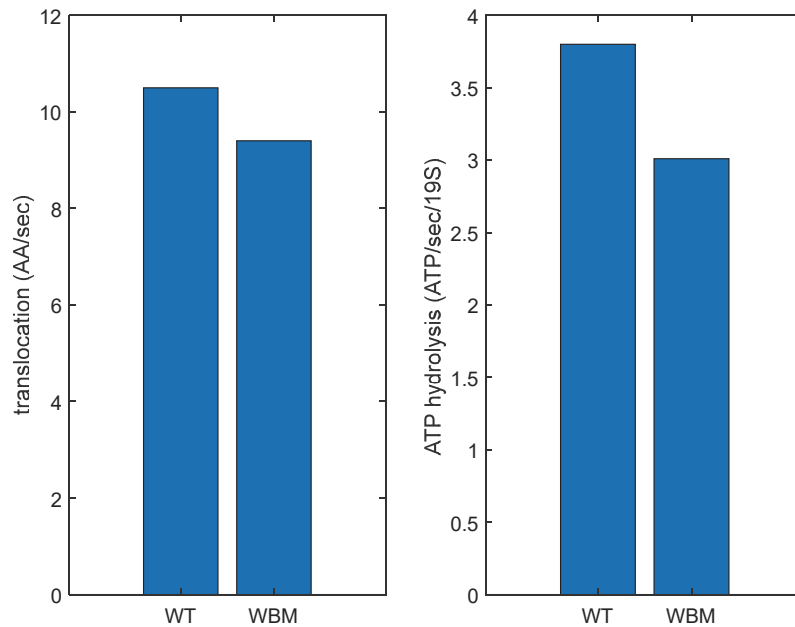

**Figure 6-figure supplement 1. The rates of substrate translocation and ATP hydrolysis for a Walker-B mutant proteasome.** The translocation rate and ATPase activity were calculated using the FEL model in which Rpt3's ATP hydrolysis activity was abolished (WBM). The results are compared with those of the wild-type (WT) proteasome.
