# Supplementary material for: An empirical energy landscape reveals mechanism of proteasome in polypeptide translocation
Source: eLife journal article supplement (doi:10.7554/elife.71911), 2022-01-20
Supplement: supp [file elife-71911-supp-v1.zip › elife_poa_e71911_Figure_6_figure_supplement_2.pdf]

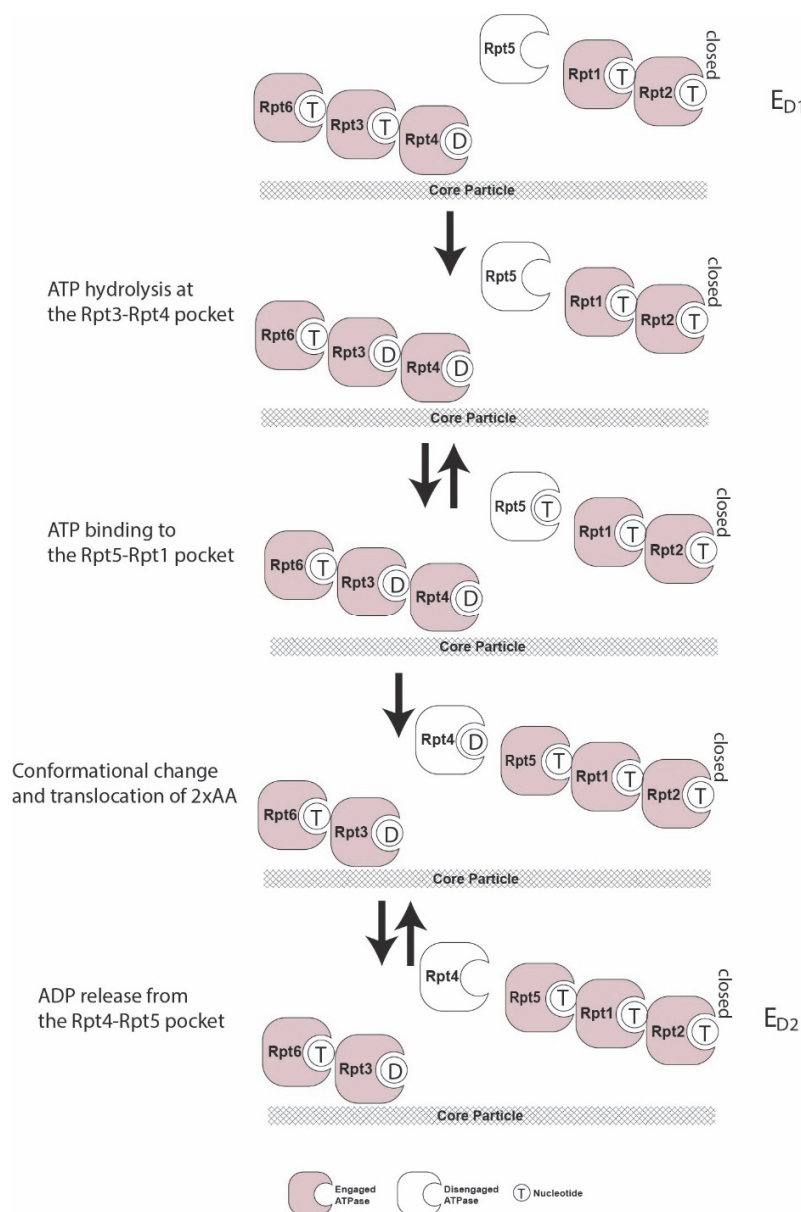

**Figure 6-figure supplement 2. The typical sequence of elementary steps underlying the  $E_{D1}$ -to- $E_{D2}$  state transition.** In a simulation of the FEL model, the probabilities of all the pathways that lead to the  $E_{D1}$  to  $E_{D2}$  transition were calculated. The pathway with the highest probability is presented. This pathway is also embedded in most other  $E_{D1}$ - $E_{D2}$  pathways. Irreversible steps are indicated by a single arrow and reversible steps are indicated by double arrows.
