# Supplementary material for: An empirical energy landscape reveals mechanism of proteasome in polypeptide translocation
Source: eLife journal article supplement (doi:10.7554/elife.71911), 2022-01-20
Supplement: supp [file elife-71911-supp-v1.zip › elife_poa_e71911_Figure_6_figure_supplement_3.pdf]

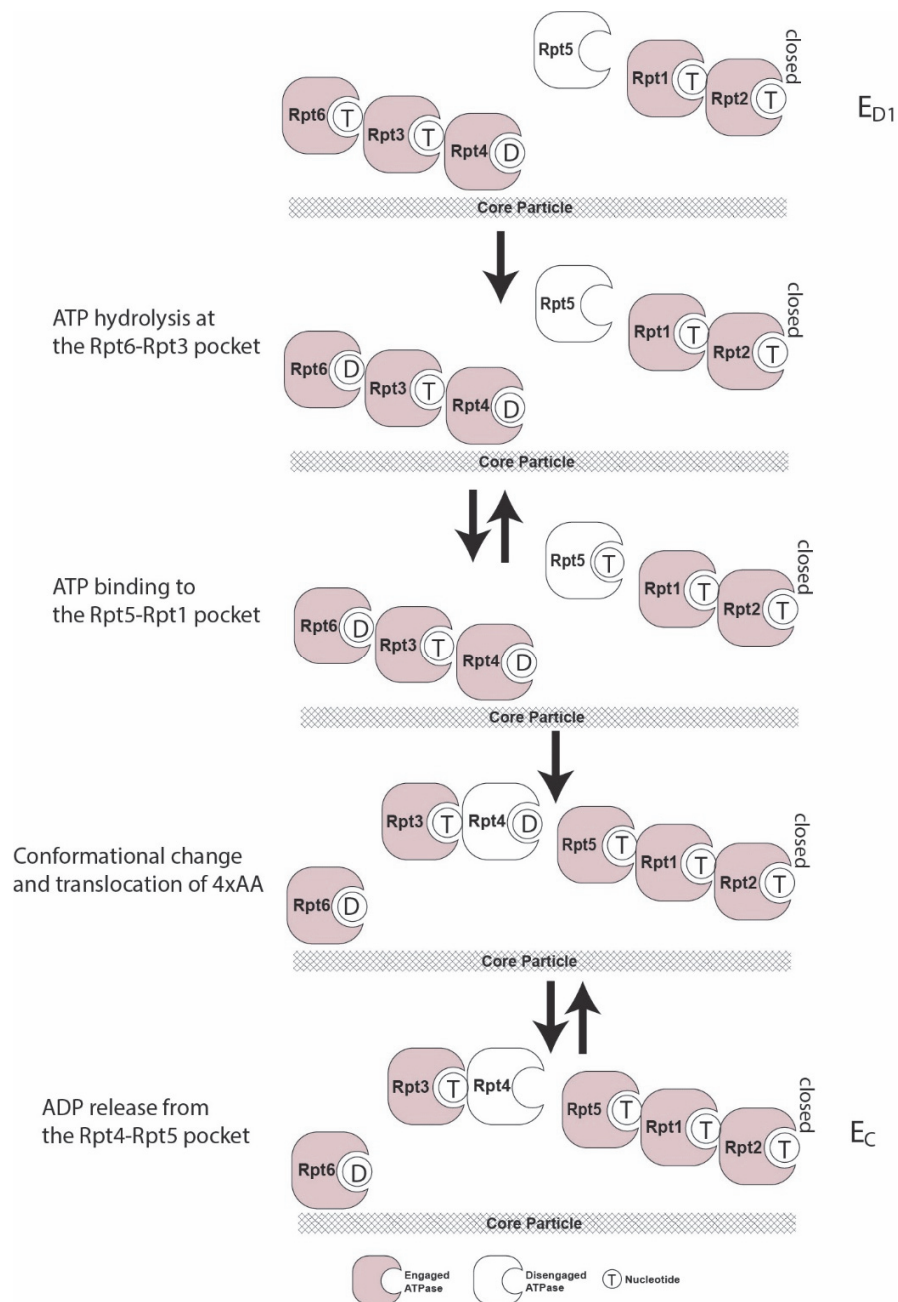

**Figure 6-figure supplement 3. The typical sequence of elementary steps underlying the  $E_{D1}$ -to- $E_C$  state transitions.** The same analysis was performed as in fig.6-fig. supp. 2, but for the  $E_{D1}$  to  $E_C$  transition.
