# Supplementary material for: An empirical energy landscape reveals mechanism of proteasome in polypeptide translocation
Source: eLife journal article supplement (doi:10.7554/elife.71911), 2022-01-20
Supplement: supp [file elife-71911-supp-v1.zip › elife_poa_e71911_Figure_6_figure_supplement_5.pdf]

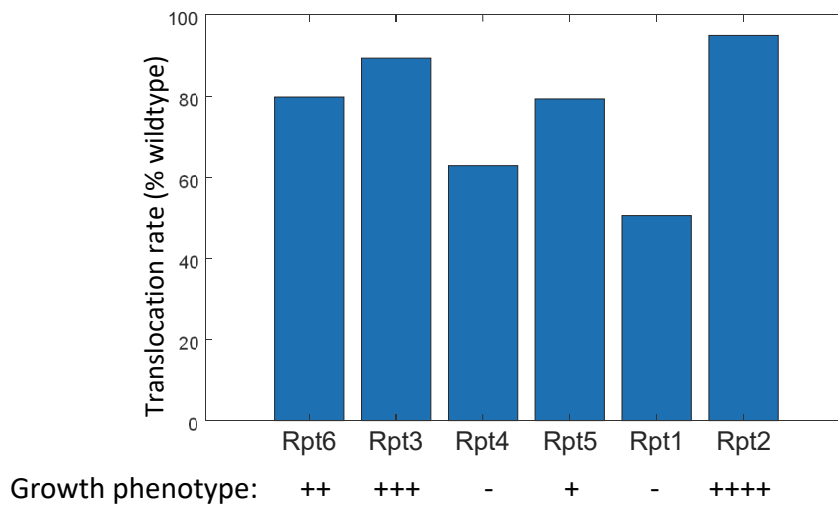

**Figure 6-figure supplement 5. The Lid-ATPase interaction may account for the different growth phenotypes of yeast Walker-B mutants.** The translocation rate was calculated for each Walker-B mutant proteasome (ATP hydrolysis set to zero) using the FEL model involving the ATPase-Lid interaction as described in methods §9.5. The growth phenotype of each Walker-B mutant is adapted from a previous study; “++++”: healthy; “+++”: slightly sick; “++”: sick; “+”: near-lethal; “-”: lethal (9). Varying the ATPase-Lid interaction from 1.6 to 4.0 kcal/mol gave qualitatively-similar results.
