# Supplementary material for: An empirical energy landscape reveals mechanism of proteasome in polypeptide translocation
Source: eLife journal article supplement (doi:10.7554/elife.71911), 2022-01-20
Supplement: supp [file elife-71911-supp-v1.zip › elife_poa_e71911_Figure_6_figure_supplement_6.pdf]

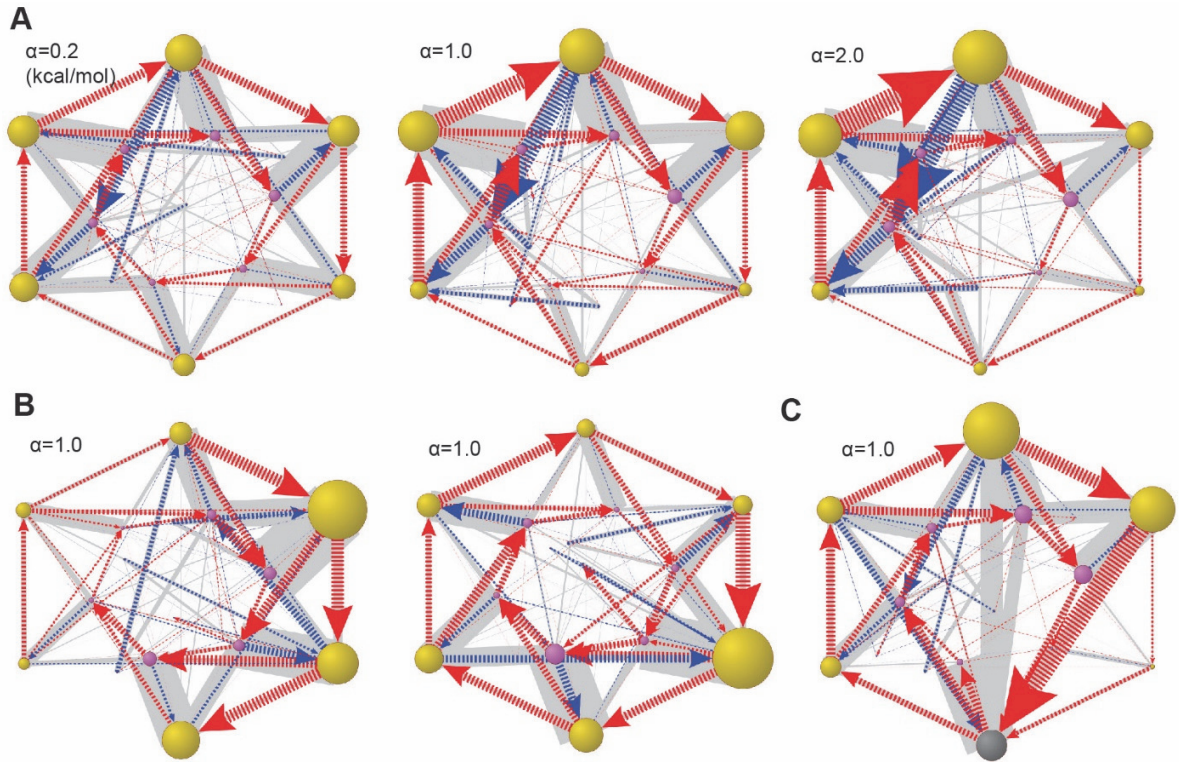

**Figure 6-figure supplement 6. Global dynamical space with heterogeneous ATPase parameters.** In the simulation, we let the basal energy  $E_b^i$  of the  $i^{\text{th}}$  ATPase =  $\alpha \times \delta^i$ .  $\delta^i$  is a random number from 0 to 1 and  $\alpha$  is a scaling constant. In **A**, we varied the value of  $\alpha$  while fixing the ratios of  $E_b^i$ . In this example,  $\delta^i = (0.45, 0.15, 0.83, 1.0, 0.68, 0.88)$ . **B**. Two cases with alternative  $\delta^i$  and the same  $\alpha$ . **C**. The same  $E_b$  setting as in A(middle), but including the Lid-ATPase interaction as in fig.6-fig. supp. 4
