# Supplementary material for: An empirical energy landscape reveals mechanism of proteasome in polypeptide translocation
Source: eLife journal article supplement (doi:10.7554/elife.71911), 2022-01-20
Supplement: supp [file elife-71911-supp-v1.zip › elife_poa_e71911_Supplementary_file_1.xlsx]

## Sheet: Table1
Conformation index	Closed interface?	Engaged ATPase?	PL1 registry	Steady-state occupancy (%)
1	111	100111	177432	0.272
2	1011	100011	177732	0.003
3	1101	1110	773217	0.027
4	1110	1111	774321	0.268
5	1111	101111	175432	13.54
6	10011	100011	177732	0.031
7	10110	111	777321	0.005
8	10111	100111	177432	3.743
9	11001	11100	732177	0.005
10	11010	11100	732177	0.036
11	11100	11110	743217	0.257
12	11101	11110	743217	3.996
13	11110	11111	754321	12.875
14	100011	110011	217743	0.241
15	100101	110001	217773	0.002
16	100110	111	777321	0.032
17	100111	110111	217543	12.094
18	101001	110001	217773	0.019
19	101011	110011	217743	3.85
20	101100	1110	773217	0.002
21	101110	1111	774321	3.894
22	110001	111001	321774	0.21
23	110010	111000	321777	0.002
24	110011	111011	321754	12.527
25	110100	111000	321777	0.024
26	110101	111001	321774	3.651
27	111000	111100	432177	0.213
28	111001	111101	432175	12.587
29	111010	111100	432177	3.751
30	111100	111110	543217	11.843

## Sheet: Table2
Conf1	Conf2	total transition	net transition	translocation	Conf1	Conf2	total transition	net transition	translocation
5	1	0.91	0.72	N	24	12	2.44	0.91	N
6	1	0.01	0.01	N	26	12	0.66	0.05	B
7	1	0.06	0.01	B	28	12	3.28	2.03	B
8	1	3.33	1.9	N	29	12	6.02	3.96	F
14	1	0.02	0.02	F	30	12	33.7	2.34	N
16	1	0.17	0.14	B	16	13	0.01	0.01	N
17	1	6.31	1.15	B	17	13	1.65	0.57	B
21	1	0.25	0.2	F	19	13	2.39	1.03	N
5	2	0.01	0	N	20	13	0.03	0.01	B
6	2	0.03	0.03	N	21	13	34.3	1.66	N
14	2	0.04	0.01	B	24	13	6.17	0.02	N
17	2	0.02	0.01	B	26	13	0.64	0.13	F
19	2	0.06	0.01	B	28	13	1.88	0.39	B
3	0	0.01	0.01	N	29	13	5.97	5.34	F
5	3	0.8	0.04	B	30	13	10.2	6.11	F
13	3	0.1	0.09	B	17	14	0.77	0.7	N
21	3	0.59	0.3	F	18	14	0.01	0.01	N
5	4	6.71	1.36	B	19	14	3.47	1.9	N
12	4	0.25	0.22	F	22	14	0.01	0.01	F
13	4	0.74	0.69	N	24	14	5.83	1.15	B
16	4	0.01	0.01	N	17	15	0.02	0.01	N
21	4	3.91	2.21	N	18	15	0.02	0.01	N
6	5	0.01	0.01	N	26	15	0.04	0.01	B
8	5	37.4	1.28	N	17	16	0.72	0.02	B
12	5	6.24	5.5	F	18	17	0.01	0.01	N
13	5	10.9	5.92	F	19	17	35	1.3	N
14	5	0.02	0.02	F	21	17	5.64	5	F
16	5	0.1	0.08	B	24	17	11.1	6.12	F
17	5	12.2	6.42	F	26	17	2.23	1.42	B
19	5	2.64	1.78	B	28	17	1.86	0.43	B
20	5	0.01	0.01	B	29	17	1.86	0.71	N
21	5	99.8	3.43	B	30	17	3.61	0.08	N
24	5	2.19	0.54	B	22	18	0.07	0.06	B
26	5	2	0.53	N	26	18	0.38	0.18	F
28	5	7.62	0.14	N	28	18	0.65	0.06	F
29	5	0.77	0.04	F	21	19	0.51	0.14	F
30	5	2.5	1.12	B	22	19	0.19	0.14	F
14	6	0.16	0.12	B	24	19	95.8	4.01	B
17	6	0.04	0.02	B	26	19	5.43	3.54	F
19	6	0.5	0.31	F	28	19	5.48	5.05	F
24	6	0.83	0.05	B	29	19	0.58	0.04	B
8	7	0.11	0.01	F	30	19	0.62	0.04	F
16	7	0.01	0.01	N	21	20	0.04	0.03	B
12	8	0.58	0.06	F	30	20	0.02	0.01	N
13	8	2.04	1.18	B	24	21	0.59	0.06	B
14	8	0.19	0.17	F	26	21	0.78	0.08	N
16	8	0.7	0.36	F	28	21	2.37	0.85	N
17	8	92.8	4.16	B	29	21	0.55	0.09	F
19	8	5.68	3.81	F	30	21	2.94	1.93	B
21	8	5.78	3.51	F	24	22	0.64	0.58	N
24	8	5.67	5.23	F	25	22	0.01	0.01	N
26	8	0.38	0.06	F	26	22	2.87	1.65	N
28	8	0.64	0.01	B	27	22	0.01	0.01	F
29	8	1.24	0.04	N	28	22	5.22	1.01	B
30	8	1.78	0.75	N	24	23	0.02	0	N
10	9	0.03	0.03	N	27	23	0.04	0.02	F
11	9	0.06	0.01	B	29	23	0.05	0.01	B
12	9	0.1	0.02	B	26	24	33	1.58	N
28	9	0.03	0.02	N	27	24	0.02	0.02	F
30	9	0.03	0.01	B	28	24	10.5	5.58	F
11	10	0.17	0.13	B	29	24	2.56	1.41	B
12	10	0.67	0.38	F	30	24	1.39	0.14	B
13	10	0.96	0.01	B	27	25	0.12	0.11	B
29	10	0.13	0.12	N	29	25	0.4	0.22	F
30	10	0.1	0.09	B	30	25	0.68	0.01	B
12	11	3.55	1.99	N	27	26	0.23	0.16	F
13	11	6.13	1.25	B	28	26	93.4	3.99	B
21	11	0.01	0.01	F	29	26	5.33	3.53	F
30	11	0.88	0.67	N	30	26	5.79	5.15	F
13	12	100	4.34	B	28	27	0.56	0.54	N
17	12	0.69	0.13	F	29	27	3.11	1.61	N
19	12	1.37	0.14	N	30	27	4.84	0.99	B
20	12	0.01	0.01	N	29	28	34.9	1.88	N
21	12	5.87	3.9	F	30	28	11.9	5.94	F
